# Supplementary material for: Simultaneous Formation of Sulfate and Nitrate via Co-uptake of SO 2 and NO 2 by Aqueous NaCl Droplets: Combined Effect of Nitrate Photolysis and Chlorine Chemistry
Source: Copernicus journal article supplement (doi:10.5194/egusphere-2023-223), 2023-02-14
Supplement: Supplementary file 1 [file egusphere-2023-223-supplement.pdf]

## Supporting Information

### **Simultaneous Formation of Sulfate and Nitrate via Co-uptake of SO<sub>2</sub> and NO<sub>2</sub> by Aqueous NaCl Droplets: Combined Effect of Nitrate Photolysis and Chlorine Chemistry**

Ruifeng Zhang<sup>1,2</sup>, Chak K. Chan<sup>1,2,3\*</sup>

<sup>1</sup>School of Energy and Environment, City University of Hong Kong, Tat Chee Avenue, Kowloon 999077, Hong Kong, China

<sup>2</sup>Shenzhen Research Institute, City University of Hong Kong, Shenzhen 518057, China

<sup>3</sup>Low-Carbon and Climate Impact Research Centre, City University of Hong Kong, Tat Chee Avenue, Kowloon 999077, Hong Kong, China

*Correspondence to:* Chak K. Chan ([chak.k.chan@cityu.edu.hk](mailto:chak.k.chan@cityu.edu.hk))

### Text S1. Calculation of Henry's law constant

The effective Henry's law constants of NO<sub>2</sub> and SO<sub>2</sub>, denoted by  $H_{NO_2}^*$  and  $H_{SO_2}^*$ , respectively, as a function of time, were estimated based on the experimental data points, and the expressions were input into the kinetic model for further simulations.

#### (1) Calculation of $H_{NO_2}^*$ .

Gaseous NO<sub>2</sub> is first absorbed onto the surface of the droplets, followed by diffusion to the bulk of particles, and then participates in a series of reactions afterward. The NO<sub>2</sub> (aq) hydrolysis ( $NO_2(aq) + NO_2(aq) + H_2O \rightarrow NO_3^- + NO_2^- + 2 H^+$ ,  $k_1 = 1.0 \times 10^8 \text{ M}^{-1} \text{ s}^{-1}$ ) would be the sole reaction in forming nitrate during unary uptake of NO<sub>2</sub> under dark. Therefore, the nitrate production rate can be estimated as below:

$$\frac{d[NO_3^-]}{dt} = k_1(H_{NO_2}^*P_{NO_2})^2 \quad (\text{Equation 1})$$

Therefore,  $H_{NO_2}^*$  can be calculated as below:

$$H_{NO_2}^* = \sqrt{\frac{d[NO_3^-]}{dt} / k_1 P_{NO_2}^2} \quad (\text{Equation 2})$$

In the present study,  $\frac{d[NO_3^-]}{dt}$  was obtained via solving the differentiation of the [NO<sub>3</sub><sup>-</sup>] equation as a function of time. Consequently,  $H_{NO_2}^*$  can be expressed as a function of time, which was input into the kinetic model for further simulations. For unary/co-uptake experiments under irradiation, the equation derived from unary uptake under dark was adjusted to fit experimentally measured nitrate and sulfate.

#### (2) Calculation of $H_{SO_2}^*$ (Griffiths et al., 2009; Gutzwiller et al., 2002; Kolb et al., 2002; Stewart et al., 2004)

There are a few pathways that could yield sulfate production. Thus, it is difficult to derive the expression of  $H_{SO_2}^*$  directly with the same method for  $H_{NO_2}^*$  described above. In this case, we calculated the reactive uptake coefficient of SO<sub>2</sub>,  $\gamma_{SO_2}$ , from experimentally measured sulfate concentration as follows:

$$\gamma_{SO_2} = \frac{d[SO_4^{2-}]}{dt} / Z \quad (\text{Equation 3})$$

$$Z = \frac{1}{4} v_{SO_2} A_s [SO_2] \quad (\text{Equation 4})$$

$$v_{SO_2} = \sqrt{8RT/\pi M_{SO_2}} \quad (\text{Equation 5})$$

$$A_s = 4\pi r_p^2 \times (4\pi r_p^3/3)^{-1}, \quad (\text{Equation 6})$$

where  $\frac{d[SO_4^{2-}]}{dt}$  was obtained via solving the differentiation of  $[SO_4^{2-}]$  equation as a function of time. Finally, we can obtain the expression of  $\gamma_{SO_2}$  as a function of time.

Besides, the  $\gamma_{SO_2}$  can also be described via the resistor model. According to the theory of gas uptake into liquid aerosol droplets, the measured uptake coefficients are given by Equation 3. Specifically, the canonical kinetic model assumes that gas molecules are accommodated at the surface first, followed by the diffusion from the surface to the bulk where the reaction takes place (Galib and Limmer 2021). The bulk reaction with rate  $k_h$  should be slow enough that an equilibrium can be established between the gas and the liquid phase, with concentrations determined by  $H_{SO_2}^*$ . Under these assumptions for the mass transfer kinetics, the reactive uptake coefficient can be estimated as below: (Galib and Limmer 2021)

$$\frac{1}{\gamma_{SO_2}} = \frac{1}{\alpha_{SO_2}} + \frac{v_{SO_2}}{4H_{SO_2}^*RT\sqrt{D_{SO_2}k_h}} \left( \coth q - \frac{1}{q} \right)^{-1} \quad (\text{Equation 7})$$

Where  $\alpha_{SO_2}$  is the accommodation coefficient of  $SO_2$  ( $\sim 0.11$ ),  $v_{SO_2}$  is the thermal velocity in the gas phase,  $T$  and  $R$  are the absolute temperature and gas constant, respectively,  $D_{SO_2}$  is the liquid diffusion coefficient ( $\sim 1.32 \times 10^{-9} \text{ m}^2 \text{ s}^{-1}$ ).  $k_h$  is a pseudo-first-order rate constant for the reaction between  $S(IV)$  and oxidants ( $k_h = k_{2nd}[\text{oxidants}]$ ). It should be noted that uptake coefficients are measured on a relatively thick liquid film compared to liquid films occurring on aerosol particles (Li et al., 2022). The diffusoreactive length is defined as the distance from the surface where the reaction occurs (Li et al., 2022; Mekic et al., 2018). The  $(\coth q - 1/q)$  is the correction factor that should be used to extrapolate the measured uptake coefficients under laboratory conditions to small particles (Li et al., 2022). The parameter  $q$  is the ratio of particle radius,  $r_p$ , to the reacto-diffusive length,  $l$ . The reacto-diffusive length,  $l = \sqrt{D_{SO_2}k_h}$ , is a measure of the mean distance from the gas/liquid interface that a molecule diffuses in the droplets before the reaction occurs (Stewart et al., 2004). Therefore, the  $H_{SO_2}^*$  can be estimated by the equation as follows:

$$H_{SO_2}^* = \frac{v_{SO_2}(\coth q - \frac{1}{q})^{-1}}{4(\frac{1}{\gamma_{SO_2}} - \frac{1}{\alpha_{SO_2}})RT\sqrt{D_{SO_2}k_h}}$$

As a result, the calculated time profiles of  $H_{SO_2}^*$  was input into the kinetic model.

**Table S1.** The mechanisms used in the kinetic model.

|      | Reactions                                                                                                                                          | Rate constant                                                                          | Note                       |
|------|----------------------------------------------------------------------------------------------------------------------------------------------------|----------------------------------------------------------------------------------------|----------------------------|
| SR1  | $\text{NO}_3^- + h\nu + \text{H}^+ \rightarrow \text{NO}_2 + \text{OH}$<br>$\text{NO}_3^- + h\nu \rightarrow \text{NO}_2^- + \text{O}(^3\text{P})$ | $j_{\text{NO}_3^-}$                                                                    | This study                 |
| SR2  | $\text{N(III)} + h\nu + \text{H}^+ \rightarrow \text{NO} + \text{OH}$<br>$\text{N(III)}: \text{NO}_2^-/\text{HNO}_2$                               | $j_{\text{NO}_2^-} = 2 j_{\text{NO}_3^-}$<br>$j_{\text{HNO}_2} = 10 j_{\text{NO}_3^-}$ | (Gen et al., 2019)         |
| SR3  | $\text{NO}_2 + \text{NO}_2 + \text{H}_2\text{O} \rightarrow \text{NO}_2^- + \text{NO}_3^- + 2 \text{H}^+$                                          | $1.0 \times 10^8$                                                                      | (Seinfeld and Pandis 2006) |
| SR4  | $\text{NO}_2 + \text{OH} \rightarrow \text{NO}_3^- + \text{H}^+$                                                                                   | $4.5 \times 10^9$                                                                      | (Benner et al., 1988)      |
| SR5  | $\text{NO}_2^- + \text{OH} \rightarrow \text{NO}_2 + \text{OH}^-$                                                                                  | $1.0 \times 10^{10}$                                                                   | (Scharko et al., 2014)     |
| SR6  | $\text{HNO}_2 + \text{OH} \rightarrow \text{NO}_2 + \text{H}_2\text{O}$                                                                            | $3.0 \times 10^9$                                                                      | (Scharko et al., 2014)     |
| SR7  | $\text{NO}_2 + \text{NO} + \text{H}_2\text{O} \rightarrow 2 \text{NO}_2^- + 2 \text{H}^+$                                                          | $2.0 \times 10^8$                                                                      | (Seinfeld and Pandis 2006) |
| SR8  | $\text{NO} + \text{OH} \rightarrow \text{NO}_2^- + \text{H}^+$                                                                                     | $2.0 \times 10^{10}$                                                                   | (Seinfeld and Pandis 2006) |
| SR9  | $\text{NO}_3 + \text{NO}_2 \rightarrow \text{N}_2\text{O}_5$                                                                                       | $1.7 \times 10^9$                                                                      | (Katsumura et al., 1991)   |
| SR10 | $\text{N}_2\text{O}_5 \rightarrow \text{NO}_2^+ + \text{NO}_3^-$                                                                                   | $>1.0 \times 10^4$                                                                     | (Behnke et al., 1997)      |
| SR11 | $\text{NO}_2^+ + \text{H}_2\text{O} \rightarrow \text{NO}_3^- + 2 \text{H}^+$                                                                      | $8.9 \times 10^7$                                                                      | (Behnke et al., 1997)      |
| SR12 | $\text{NO}_2^+ + \text{Cl}^- \rightarrow \text{ClNO}_2$                                                                                            | $3.9 \times 10^{10}$                                                                   | (Behnke et al., 1997)      |
| SR13 | $\text{NO}_3 + \text{H}_2\text{O}_2 \rightarrow \text{NO}_3^- + \text{H}^+ + \text{HO}_2$                                                          | $1.0 \times 10^6$                                                                      | (Seinfeld and Pandis 2006) |
| SR14 | $\text{NO}_3 + \text{HO}_2 \rightarrow \text{NO}_3^- + \text{O}_2 + \text{H}^+$                                                                    | $4.5 \times 10^9$                                                                      | (Seinfeld and Pandis 2006) |
| SR15 | $\text{OH} + \text{OH} \rightarrow \text{H}_2\text{O}_2$                                                                                           | $5.5 \times 10^9$                                                                      | (Zhang et al., 2021)       |
| SR16 | $\text{O}(^3\text{P}) + \text{O}_2 \rightarrow \text{O}_3$                                                                                         | $4.0 \times 10^9$                                                                      | (Klänning et al., 1984)    |
| SR17 | $\text{OH} + \text{O}_3 \rightarrow \text{HO}_2 + \text{O}_2$                                                                                      | $1.0 \times 10^8$                                                                      | (Sehested et al., 1984)    |
| SR18 | $\text{OH} + \text{H}_2\text{O}_2 \rightarrow \text{HO}_2 + \text{H}_2\text{O}$                                                                    | $2.7 \times 10^7$                                                                      | (Buxton et al., 1988)      |
|      |                                                                                                                                                    |                                                                                        |                            |
| SR19 | $\text{HSO}_3^- + \text{OH} \rightarrow \text{SO}_3^- + \text{H}_2\text{O}$                                                                        | $4.5 \times 10^9$                                                                      | (Seinfeld and              |

|      |                                                                                                                     |                                                                      |                            |
|------|---------------------------------------------------------------------------------------------------------------------|----------------------------------------------------------------------|----------------------------|
|      |                                                                                                                     |                                                                      | Pandis 2006)               |
| SR20 | $\text{SO}_3^- + \text{O}_2 \rightarrow \text{SO}_5^-$                                                              | $1.5 \times 10^9$                                                    | (Seinfeld and Pandis 2006) |
| SR21 | $\text{SO}_5^- + \text{HSO}_3^- \rightarrow \text{HSO}_5^- + \text{SO}_3^-$                                         | $2.5 \times 10^4$                                                    | (Seinfeld and Pandis 2006) |
| SR22 | $\text{SO}_5^- + \text{HSO}_3^- \rightarrow \text{SO}_4^{2-} + \text{H}^+$                                          | $7.5 \times 10^4$                                                    | (Seinfeld and Pandis 2006) |
| SR23 | $\text{SO}_4^- + \text{HSO}_3^- \rightarrow \text{SO}_4^{2-} + \text{SO}_3^- + \text{H}^+$                          | $7.5 \times 10^8$                                                    | (Seinfeld and Pandis 2006) |
| SR24 | $\text{SO}_4^- + \text{SO}_4^- \rightarrow \text{S}_2\text{O}_8^{2-}$                                               | $4.5 \times 10^8$                                                    | (Seinfeld and Pandis 2006) |
| SR25 | $\text{SO}_4^- + \text{NO}_3^- \rightarrow \text{SO}_4^{2-} + \text{NO}_3$                                          | $5.0 \times 10^4$                                                    | (Løgager et al., 1993)     |
| SR26 | $\text{SO}_4^- + \text{HO}_2 \rightarrow \text{SO}_4^{2-} + \text{H}^+ + \text{O}_2$                                | $5.0 \times 10^9$                                                    | (Seinfeld and Pandis 2006) |
| SR27 | $\text{SO}_4^- + \text{H}_2\text{O}_2 \rightarrow \text{SO}_4^{2-} + \text{H}^+ + \text{HO}_2$                      | $1.2 \times 10^7$                                                    | (Seinfeld and Pandis 2006) |
| SR28 | $\text{SO}_4^- + \text{OH}^- \rightarrow \text{OH} + \text{SO}_4^{2-}$                                              | $8.0 \times 10^7$                                                    | (Seinfeld and Pandis 2006) |
| SR29 | $\text{SO}_4^- + \text{OH} \rightarrow \text{HSO}_5^-$                                                              | $9.5 \times 10^9$                                                    | (Klaning et al., 1991)     |
| SR30 | $\text{SO}_3^- + \text{SO}_3^- \rightarrow \text{S}_2\text{O}_6^{2-}$                                               | $7.0 \times 10^8$                                                    | (Seinfeld and Pandis 2006) |
| SR31 | $\text{SO}_5^- + \text{SO}_5^- \rightarrow \text{S}_2\text{O}_8^{2-} + \text{O}_2$                                  | $1.4 \times 10^8$                                                    | (Seinfeld and Pandis 2006) |
| SR32 | $\text{SO}_5^- + \text{SO}_5^- \rightarrow 2 \text{SO}_4^{2-} + \text{O}_2$                                         | $6.0 \times 10^8$                                                    | (Seinfeld and Pandis 2006) |
| SR33 | $\text{HSO}_5^- + \text{HSO}_3^- + \text{H}^+ \rightarrow 2 \text{SO}_4^{2-} + 3 \text{H}^+$                        | $7.1 \times 10^6$                                                    | (Seinfeld and Pandis 2006) |
| SR34 | $\text{HSO}_5^- + \text{SO}_4^- \rightarrow \text{SO}_5^- + \text{SO}_4^{2-} + \text{H}^+$                          | $<1.0 \times 10^5$                                                   | (Seinfeld and Pandis 2006) |
| SR35 | $\text{HSO}_5^- + \text{OH} \rightarrow \text{SO}_5^- + \text{H}_2\text{O}$                                         | $1.7 \times 10^7$                                                    | (Seinfeld and Pandis 2006) |
| SR36 | $\text{HSO}_3^- + \text{NO}_3 \rightarrow \text{NO}_3^- + \text{H}^+ + 2 \text{SO}_3^-$                             | $1.4 \times 10^8$                                                    | (Seinfeld and Pandis 2006) |
| SR37 | $\text{HSO}_3^- + \text{H}_2\text{O}_2 \rightarrow \text{SO}_4^{2-} + \text{H}_2\text{O}$                           | $7.45 \times 10^7$                                                   | (Seinfeld and Pandis 2006) |
| SR38 | $2 \text{NO}_2 + \text{HSO}_3^- + \text{H}_2\text{O} \rightarrow \text{SO}_4^{2-} + 2 \text{NO}_2^- + 3 \text{H}^+$ | $2.0 \times 10^6$                                                    | (Seinfeld and Pandis 2006) |
| SR39 | $\text{NO}_2^- + \text{HSO}_3^- + \text{H}^+ \rightarrow \text{NOH} + \text{SO}_4^{2-} + 2 \text{H}^+$              | $3.8 \times 10^3$                                                    | (Gen et al., 2019)         |
|      |                                                                                                                     |                                                                      |                            |
| SR40 | $\text{Cl}^- + h\nu \rightarrow \text{Cl}$                                                                          | $j_{\text{Cl}^-}$                                                    | This study                 |
| SR41 | $\text{Cl}^- + \text{OH} \leftrightarrow \text{ClOH}^-$                                                             | $k_f = 4.3 \times 10^9$<br>$k_r = 6.1 \times 10^9$                   | (Seinfeld and Pandis 2006) |
| SR42 | $\text{Cl}^- + \text{Cl} \leftrightarrow \text{Cl}_2^-$                                                             | $k_f = 6.5 \times 10^9$<br>$k_r = 6.0 \times 10^4$                   | (Zhang et al., 2020)       |
| SR43 | $\text{Cl} + \text{H}_2\text{O} \leftrightarrow \text{ClOH}^- + \text{H}^+$                                         | $k_f = 1.3 \times 10^3 \text{ s}^{-1}$<br>$k_r = 2.1 \times 10^{10}$ | (Seinfeld and Pandis 2006; |

|      |                                                                                             |                                                                       |                                |
|------|---------------------------------------------------------------------------------------------|-----------------------------------------------------------------------|--------------------------------|
|      |                                                                                             |                                                                       | Zhang et al.,<br>2020)         |
| SR44 | $\text{Cl} + \text{Cl} \rightarrow \text{Cl}_2$                                             | $8.8 \times 10^7$                                                     | (Bulman et al.,<br>2019)       |
| SR45 | $\text{Cl} + \text{Cl}_2^- \rightarrow \text{Cl}_2 + \text{Cl}^-$                           | $2.1 \times 10^9$                                                     | (Yu and Barker<br>2003)        |
| SR46 | $\text{Cl} + \text{NO}_3^- \leftrightarrow \text{NO}_3 + \text{Cl}^-$                       | $k_f = 1.0 \times 10^8$<br>$k_r = 3.5 \times 10^8$                    | (Poskrebyshev et<br>al., 2003) |
| SR47 | $\text{Cl} + \text{HO}_2 \rightarrow \text{Cl}^- + \text{O}_2 + \text{H}^+$                 | $3.1 \times 10^9$                                                     | (Seinfeld and<br>Pandis 2006)  |
| SR48 | $\text{Cl} + \text{H}_2\text{O}_2 \rightarrow \text{Cl}^- + \text{HO}_2 + \text{H}^+$       | $4.5 \times 10^7$                                                     | (Seinfeld and<br>Pandis 2006)  |
| SR49 | $\text{Cl}_2^- + \text{OH} \rightarrow \text{HOCl} + \text{Cl}^-$                           | $1.0 \times 10^9$                                                     | (Bulman et al.,<br>2019)       |
| SR50 | $\text{Cl}_2^- + \text{NO}_3 \rightarrow \text{NO}_3^- + \text{Cl}_2$                       | $1.0 \times 10^9$                                                     | (Poskrebyshev et<br>al., 2003) |
| SR51 | $\text{Cl}_2^- + \text{HO}_2 \rightarrow 2 \text{Cl}^- + \text{O}_2 + \text{H}^+$           | $4.5 \times 10^9$                                                     | (Seinfeld and<br>Pandis 2006)  |
| SR52 | $\text{Cl}_2^- + \text{OH}^- \rightarrow 2 \text{Cl}^- + \text{OH}$                         | $7.3 \times 10^6 \text{ s}^{-1}$                                      | (Seinfeld and<br>Pandis 2006)  |
| SR53 | $\text{Cl}_2^- + \text{H}_2\text{O}_2 \rightarrow 2 \text{Cl}^- + \text{HO}_2 + \text{H}^+$ | $1.4 \times 10^5$                                                     | (Seinfeld and<br>Pandis 2006)  |
| SR54 | $\text{HOCl} \leftrightarrow \text{H}^+ + \text{OCl}^-$                                     | $k_f = 1.41 \times 10^3 \text{ s}^{-1}$<br>$k_r = 5.0 \times 10^{10}$ | (Bulman et al.,<br>2019)       |
| SR55 | $\text{Cl}^- + \text{HSO}_5^- \rightarrow \text{SO}_4^{2-} + \text{product}$                | $1.8 \times 10^{-3}$                                                  | (Seinfeld and<br>Pandis 2006)  |
| SR56 | $\text{Cl}^- + \text{SO}_4^- \leftrightarrow \text{SO}_4^{2-} + \text{Cl}$                  | $k_f = 2.0 \times 10^8$<br>$k_r = 2.5 \times 10^8$                    | (Machulek et al.,<br>2009)     |
| SR57 | $\text{Cl} + \text{HSO}_3^- \rightarrow \text{Cl}^- + \text{H}^+ + \text{SO}_3^-$           | $3.4 \times 10^9$                                                     | (Huie and Neta<br>1987)        |
| SR58 | $\text{HOCl} + \text{HSO}_3^- \rightarrow \text{SO}_4^{2-} + \text{Cl}^- + 2 \text{H}^+$    | $7.6 \times 10^8$                                                     | (Horváth et al.,<br>2006)      |
| SR59 | $\text{Cl}_2^- + \text{HSO}_3^- \rightarrow 2 \text{Cl}^- + \text{H}^+ + \text{SO}_3^-$     | $3.4 \times 10^8$                                                     | (Seinfeld and<br>Pandis 2006)  |
|      |                                                                                             |                                                                       |                                |

**Table S2.** Initial chloride concentration input in the kinetic model.

| Exp.<br># | Experimental conditions              | E-AIM predicted<br>[Cl <sup>-</sup> ] (M) | Corrected [Cl <sup>-</sup> ]<br>(M) |
|-----------|--------------------------------------|-------------------------------------------|-------------------------------------|
| 1         | NaCl droplets equilibrated at 80% RH | 4.6                                       | 3.9                                 |
| 2         | NaCl droplets equilibrated at 70% RH | 6.2                                       | 5.5                                 |
| 3         | NaCl droplets equilibrated at 60% RH | 7.7                                       | 6.3                                 |

**Table S3.** Summary of nitrate photolysis rate constant,  $j_{\text{NO}_3^-}$ , and chloride photolysis rate constant,  $j_{\text{Cl}^-}$ .

| Conditions                                                 | $j_{\text{NO}_3^-}$ ( $\text{s}^{-1}$ ) | $j_{\text{Cl}^-}$ ( $\text{s}^{-1}$ ) |
|------------------------------------------------------------|-----------------------------------------|---------------------------------------|
| NaCl + SO <sub>2</sub> + light at 80% RH                   | N/A                                     | $1.8 \times 10^{-7}$                  |
| NaCl + SO <sub>2</sub> + light at 70% RH                   | N/A                                     | $4.7 \times 10^{-7}$                  |
| NaCl + SO <sub>2</sub> + light at 60% RH                   | N/A                                     | $5.6 \times 10^{-7}$                  |
| NaCl + NO <sub>2</sub> + light at 80% RH                   | $1.2 \times 10^{-6}$                    | $5.3 \times 10^{-7}$                  |
| NaCl + NO <sub>2</sub> + light at 70% RH                   | $1.2 \times 10^{-6}$                    | $5.1 \times 10^{-7}$                  |
| NaCl + NO <sub>2</sub> + light at 60% RH                   | $1.2 \times 10^{-6}$                    | $5.0 \times 10^{-7}$                  |
| NaCl + SO <sub>2</sub> + NO <sub>2</sub> + light at 80% RH | $1.4 \times 10^{-6}$                    | $3.8 \times 10^{-7}$                  |
| NaCl + SO <sub>2</sub> + NO <sub>2</sub> + light at 70% RH | $1.4 \times 10^{-6}$                    | $4.4 \times 10^{-7}$                  |
| NaCl + SO <sub>2</sub> + NO <sub>2</sub> + light at 60% RH | $1.6 \times 10^{-6}$                    | $4.1 \times 10^{-7}$                  |

**Table S4.** Sulfate production rate under various conditions.

| Exp. # | Experimental conditions                                         | Averaged Sulfate production rate (first stage) ( $\text{M}\cdot\text{s}^{-1}$ ) | Averaged Sulfate production rate (second stage) ( $\text{M}\cdot\text{s}^{-1}$ ) |
|--------|-----------------------------------------------------------------|---------------------------------------------------------------------------------|----------------------------------------------------------------------------------|
| 1      | NaCl + NO <sub>2</sub> + SO <sub>2</sub> + light + air + 80% RH | $1.6 \times 10^{-6}$                                                            | $2.7 \times 10^{-6}$                                                             |
| 2      | NaCl + SO <sub>2</sub> + light + air + 80% RH                   | $1.3 \times 10^{-6}$                                                            |                                                                                  |
| 3      | NaCl + NO <sub>2</sub> + SO <sub>2</sub> + light + air + 70% RH | $2.3 \times 10^{-6}$                                                            | $5.9 \times 10^{-6}$                                                             |
| 4      | NaCl + SO <sub>2</sub> + light + air + 70% RH                   | $2.3 \times 10^{-6}$                                                            |                                                                                  |
| 5      | NaCl + NO <sub>2</sub> + SO <sub>2</sub> + light + air + 60% RH | $3.1 \times 10^{-6}$                                                            | $8.6 \times 10^{-6}$                                                             |
| 6      | NaCl + SO <sub>2</sub> + light + air + 60% RH                   | $3.3 \times 10^{-6}$                                                            |                                                                                  |
| 7      | NaCl + SO <sub>2</sub> + light (low intensity) + air + 60% RH   | $1.7 \times 10^{-6}$                                                            |                                                                                  |

**Table S5.** Uptake coefficient of SO<sub>2</sub>,  $\gamma_{\text{SO}_2}$ , at different RHs.

| Exp. # | Experimental conditions                                         | $\gamma_{\text{SO}_2}$ , (first stage) | $\gamma_{\text{SO}_2}$ , (second stage) |
|--------|-----------------------------------------------------------------|----------------------------------------|-----------------------------------------|
| 1      | NaCl + NO <sub>2</sub> + SO <sub>2</sub> + light + air + 80% RH | $(0.7 \pm 0.12) \times 10^{-6}$        | $(1.2 \pm 0.09) \times 10^{-6}$         |
| 2      | NaCl + SO <sub>2</sub> + light + air + 80% RH                   | $(0.7 \pm 0.03) \times 10^{-6}$        |                                         |

|   |                                                                    |                                 |                                 |
|---|--------------------------------------------------------------------|---------------------------------|---------------------------------|
| 3 | NaCl + NO <sub>2</sub> + SO <sub>2</sub> +<br>light + air + 70% RH | $(1.1 \pm 0.06) \times 10^{-6}$ | $(2.8 \pm 0.06) \times 10^{-6}$ |
| 4 | NaCl + SO <sub>2</sub> + light + air<br>+ 70% RH                   | $(1.1 \pm 0.08) \times 10^{-6}$ |                                 |
| 5 | NaCl + NO <sub>2</sub> + SO <sub>2</sub> +<br>light + air + 60% RH | $(1.4 \pm 0.11) \times 10^{-6}$ | $(4.0 \pm 0.10) \times 10^{-6}$ |
| 6 | NaCl + SO <sub>2</sub> + light + air<br>+ 60% RH                   | $(1.4 \pm 0.10) \times 10^{-6}$ |                                 |



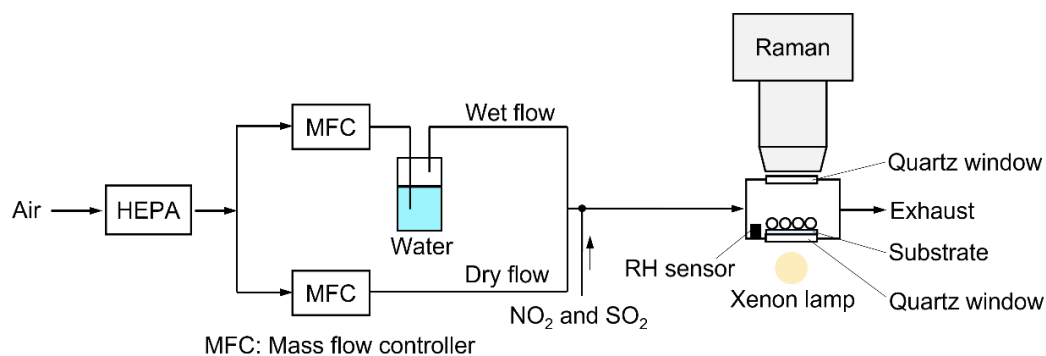

**Figure S1.** The Raman Spectroscopy/Flow cell setup.

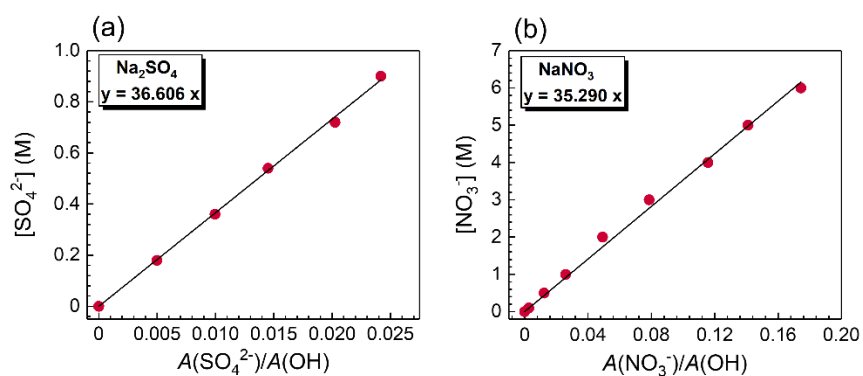

**Figure S2.** Calibration curve of (a)  $\text{Na}_2\text{SO}_4$  and (b)  $\text{NaNO}_3$ .

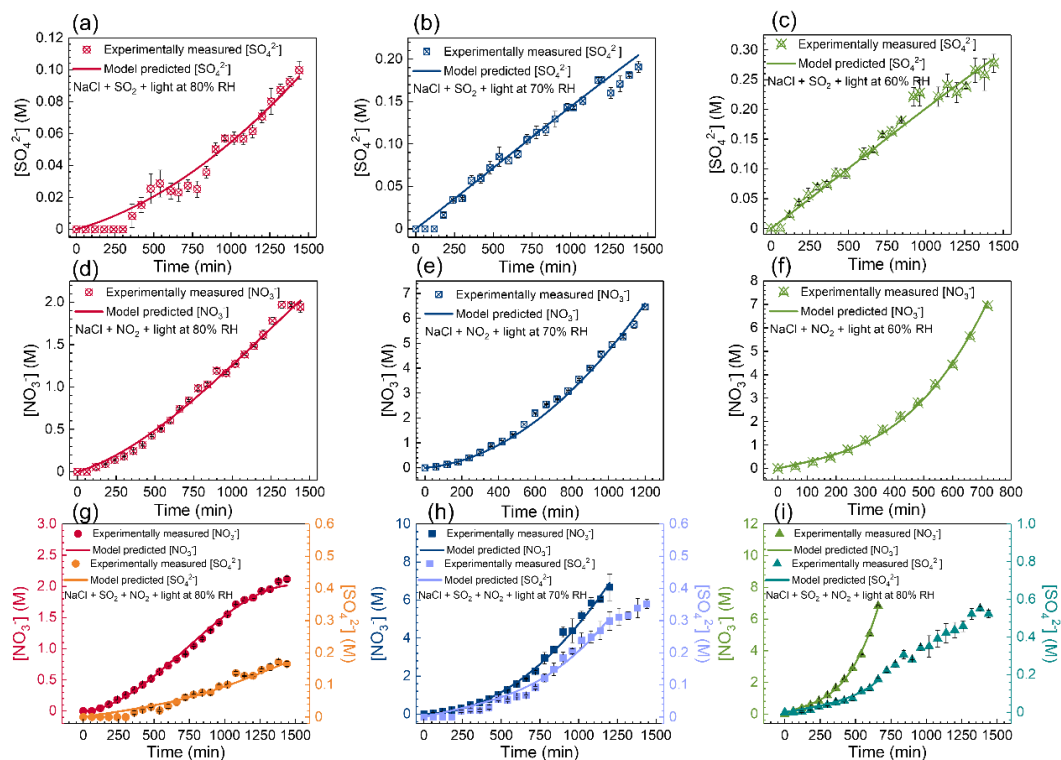

**Figure S3.** Experimentally measured and model-predicted sulfate and nitrate concentration as a function of time under various conditions.

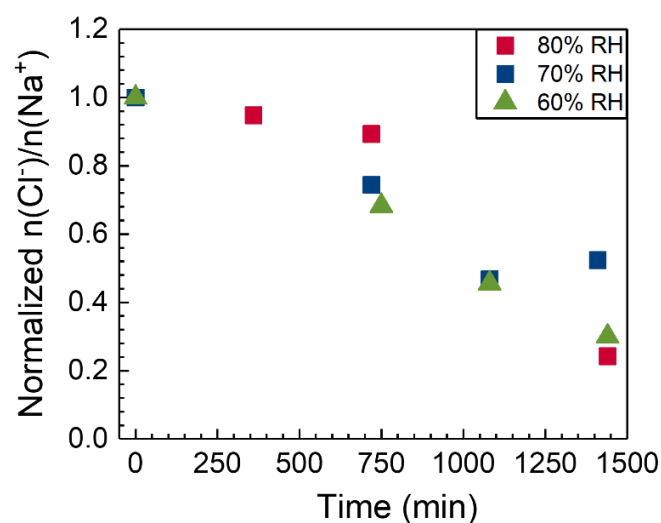

**Figure S4.** Cl depletion during unary uptake of  $\text{NO}_2$  into NaCl droplets under dark. The initial  $n(\text{Cl}^-)/n(\text{Na}^+)$  after equilibrium is 0.84, 0.88, and 0.82 at 60%, 70%, and 80% RH, respectively. The corrected initial  $\text{Cl}^-$  concentration based on the  $n(\text{Cl}^-)/n(\text{Na}^+)$  was input into the model.

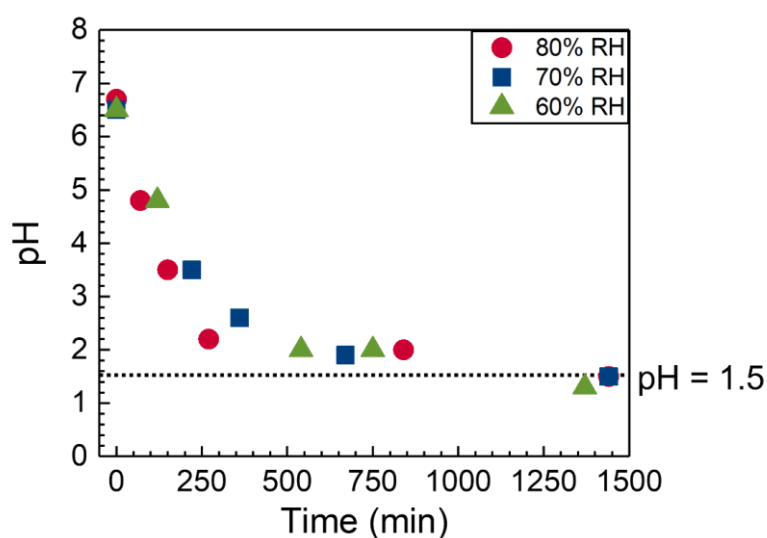

**Figure S5.** pH as a function of time during the unary uptake of  $\text{NO}_2$  into aqueous NaCl droplet under dark at 60%, 70%, and 80% RH. Considering that pH drops quickly at the initial stage and the fast uptake of  $\text{NO}_2$ , the  $\text{pH} = 1.5$  as a fixed value was input into the model under conditions with the involvement of  $\text{NO}_2$ .

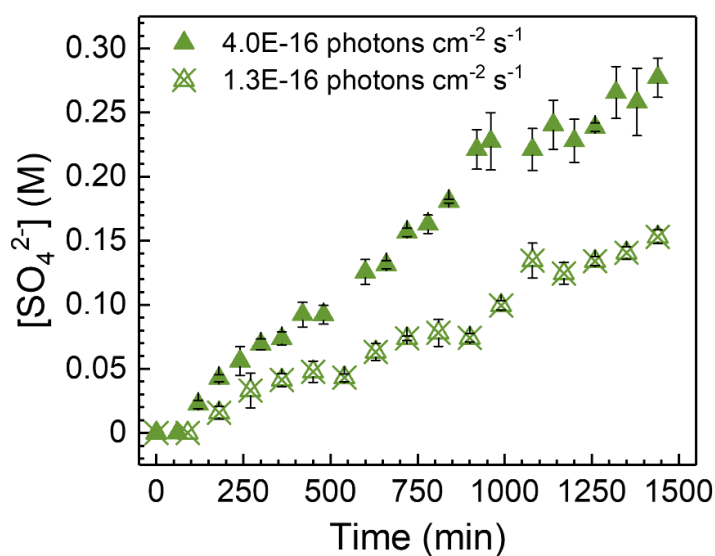

**Figure S6.** Sulfate concentration as a function of time during the unary uptake of  $\text{SO}_2$  into NaCl droplets at 60% RH at different light intensities.

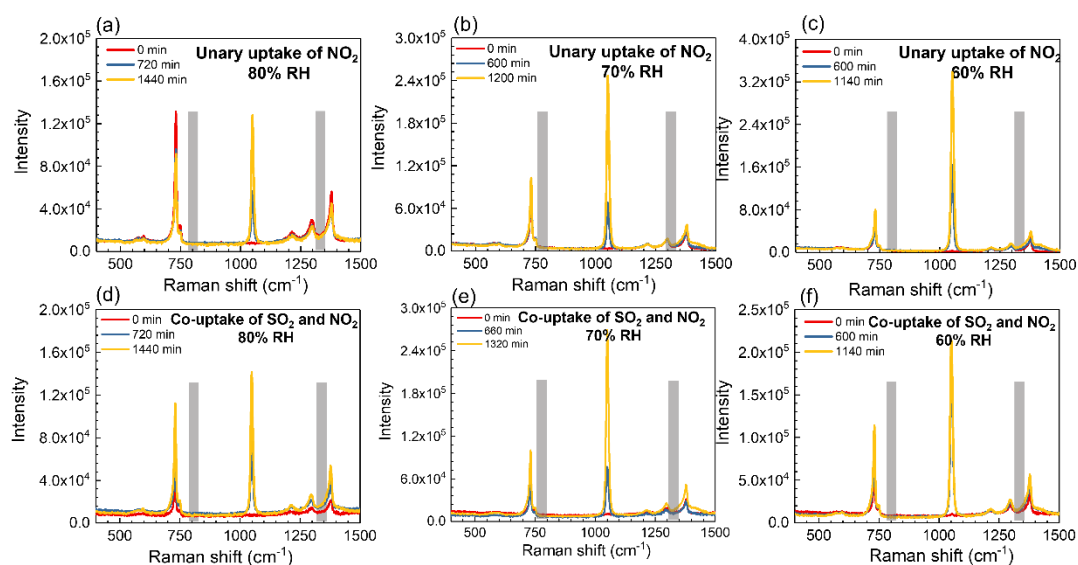

**Figure S7.** The time profiles of Raman spectra under dark. The shaded area represents the Raman feature of nitrite.

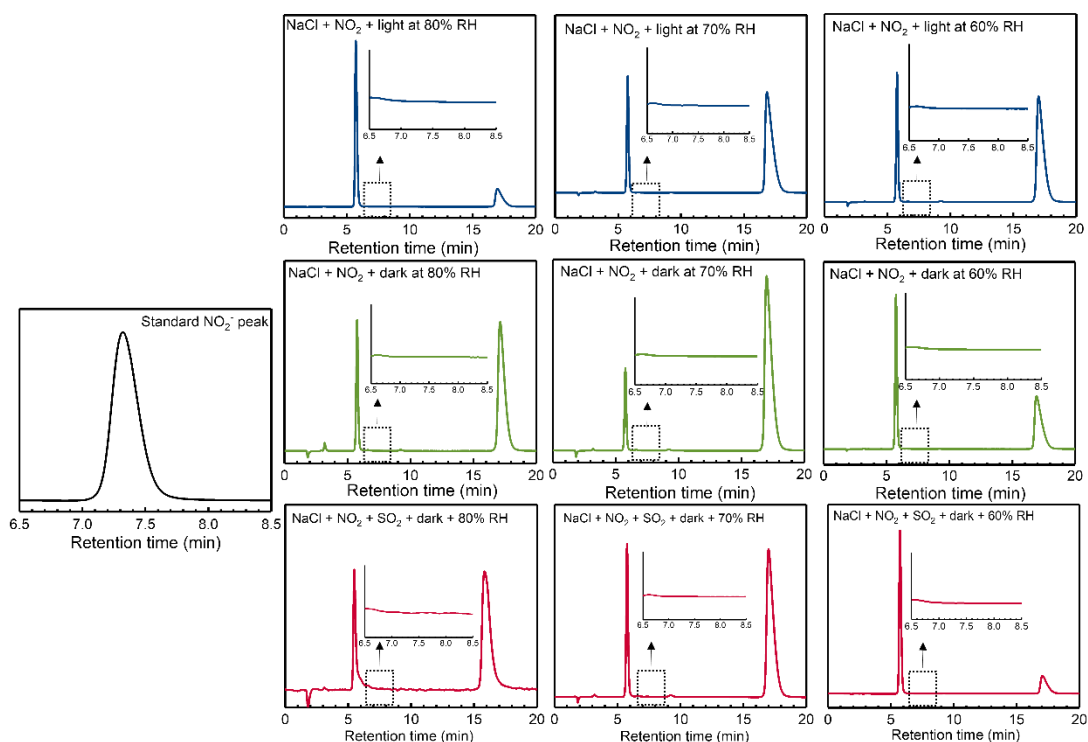

**Figure S8.** IC measurements.

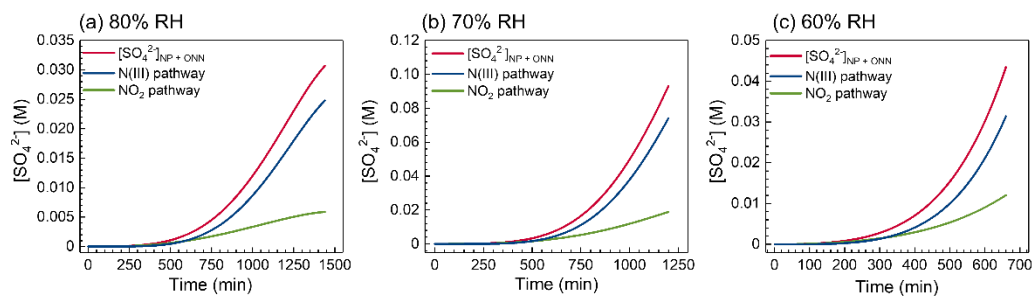

**Figure S9.** The contribution of N(III) pathway and  $\text{NO}_2$  pathway to sulfate production.

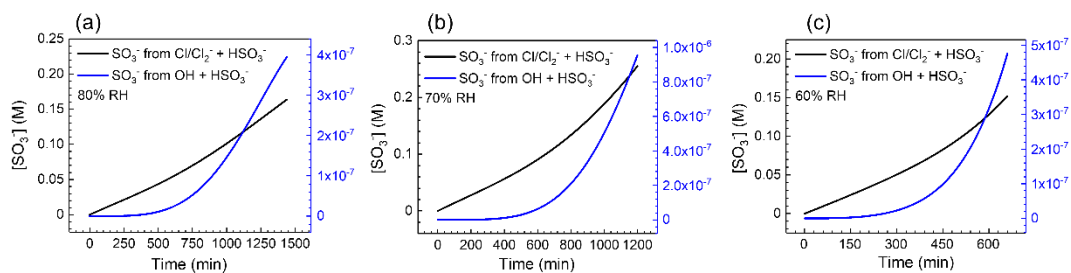

**Figure S10.** Model predicted  $\text{SO}_3^-$  concentration from the reaction of  $\text{Cl}^-/\text{Cl}_2^- + \text{HSO}_3^-$  and  $\text{OH} + \text{HSO}_3^-$ .

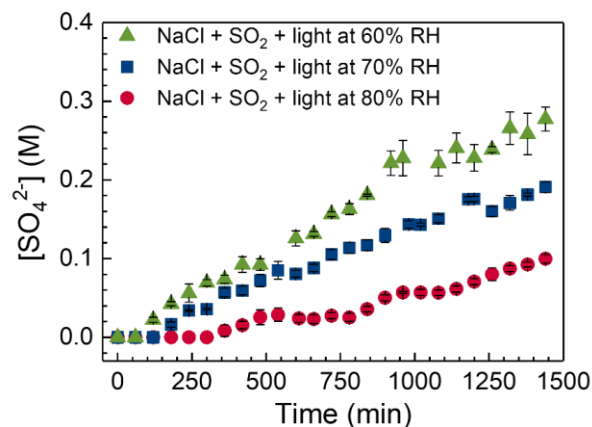

**Figure S11.** Sulfate concentration as a function of time during the uptake of  $\text{SO}_2$  into NaCl droplets under irradiation at different RHs.

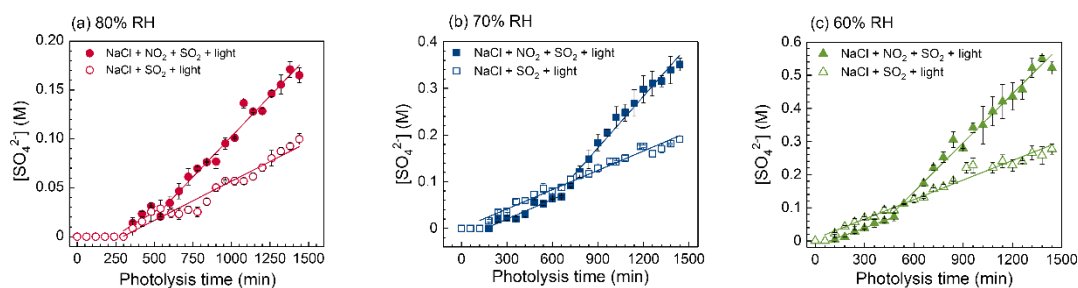

**Figure S12.** Sulfate concentration as a function of photolysis time at (a) 80% RH, (b) 70% RH, and (c) 60% RH.

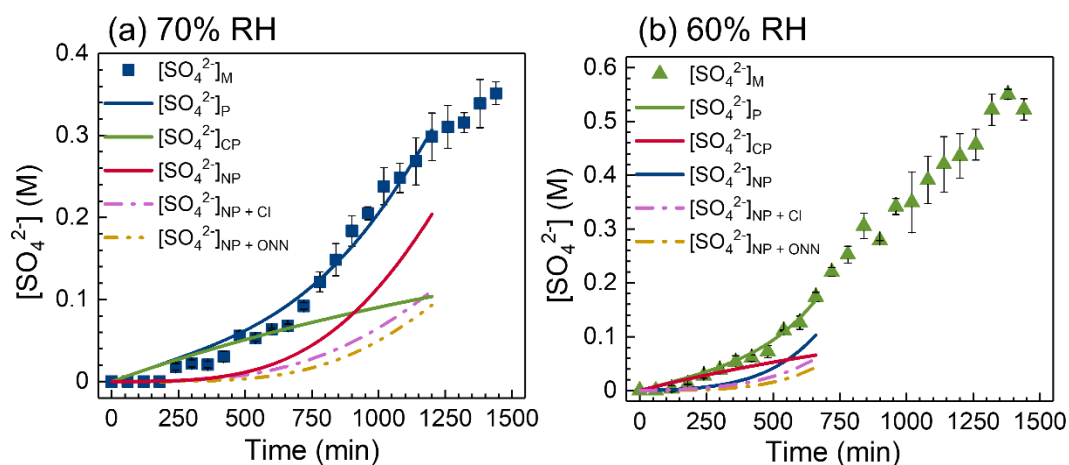

**Figure S13.** Model prediction of sulfate concentration under various conditions at 60% and 70% RH.

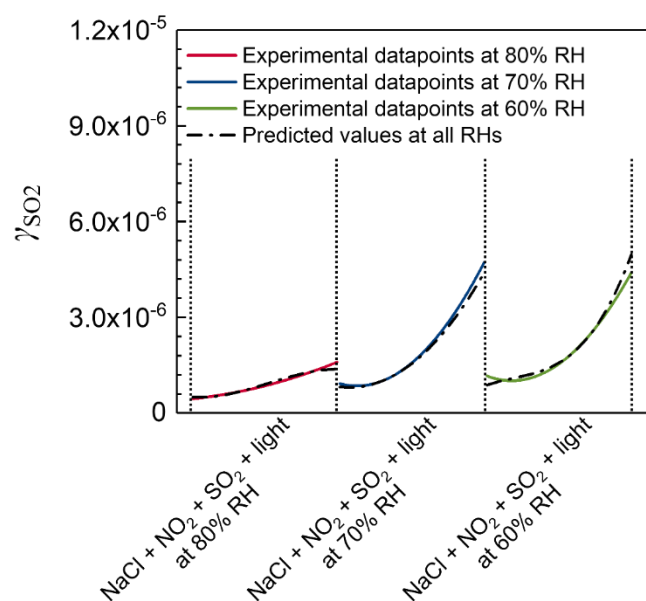

**Figure S14.** The  $\gamma_{SO_2}$  from experiments NaCl + NO<sub>2</sub> + SO<sub>2</sub> + light at 80%, 70%, and 60% RH and predicted  $\gamma_{SO_2}$  from the derived expression of  $\gamma_{SO_2} = 0.41 \times P_{NO_3^-} + 0.34 \times P_{Cl^-}$ .

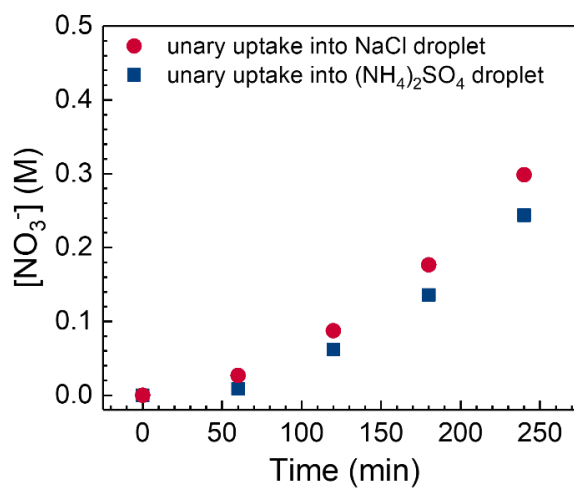

**Figure S15.** Unary uptake of NO<sub>2</sub> into NaCl droplets and (NH<sub>4</sub>)<sub>2</sub>SO<sub>4</sub> droplets at 80% RH under dark.

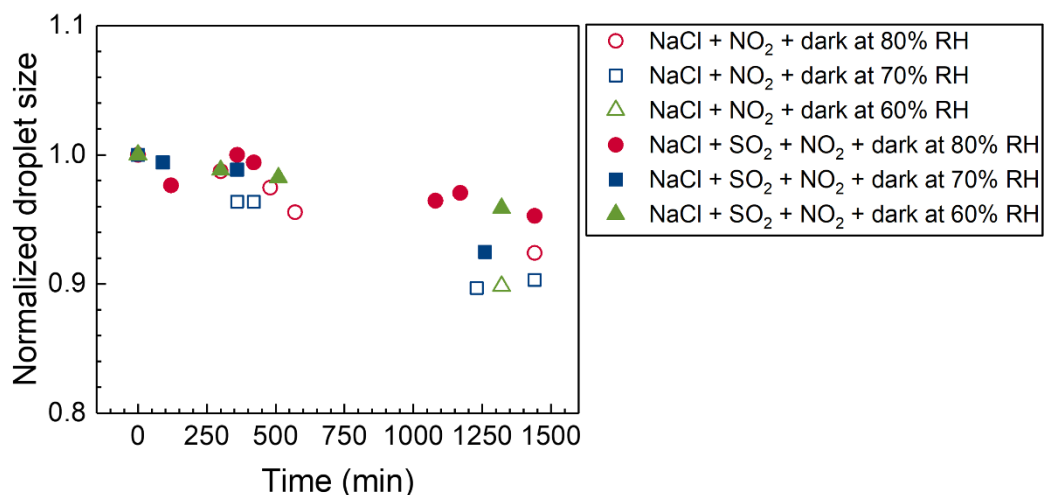

**Figure S16.** Normalized droplet size as a function of time under various conditions.

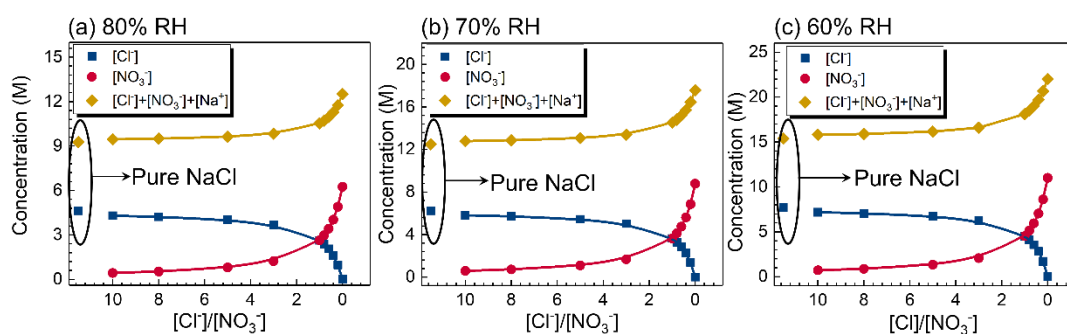

**Figure S17.** E-AIM model predicted nitrate, chloride, and total ions (represent ionic strength) concentration at different  $[Cl^-]/[NO_3^-]$  at (a) 80% RH, (b) 70% RH, and (c) 60% RH.

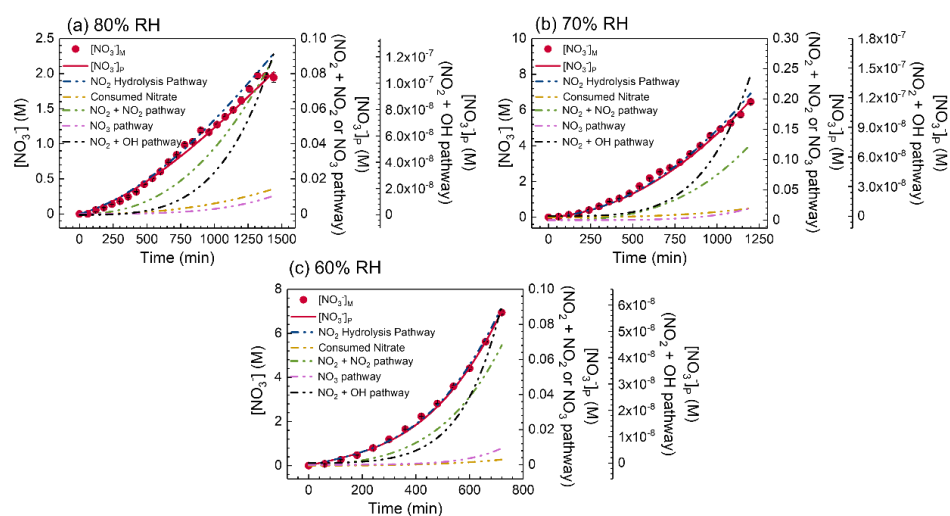

**Figure S18.** Model simulation of nitrate formation from unary uptake of  $\text{NO}_2$  under irradiation.

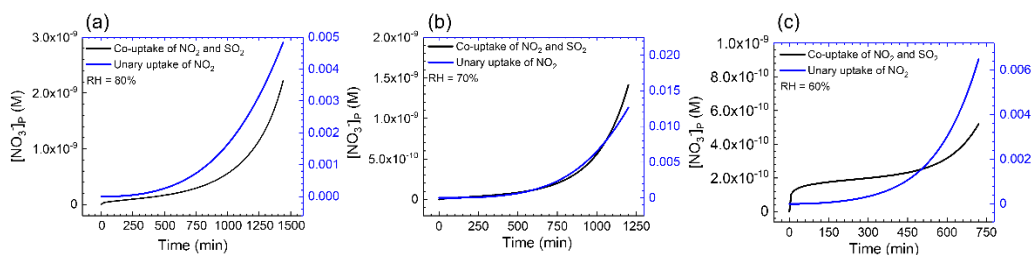

**Figure S19.** Nitrate from the reaction of  $\text{Cl}_2^- + \text{NO}_3$  during unary uptake and co-uptake at (a) 80% RH, (b) 70% RH, and (c) 60% RH.

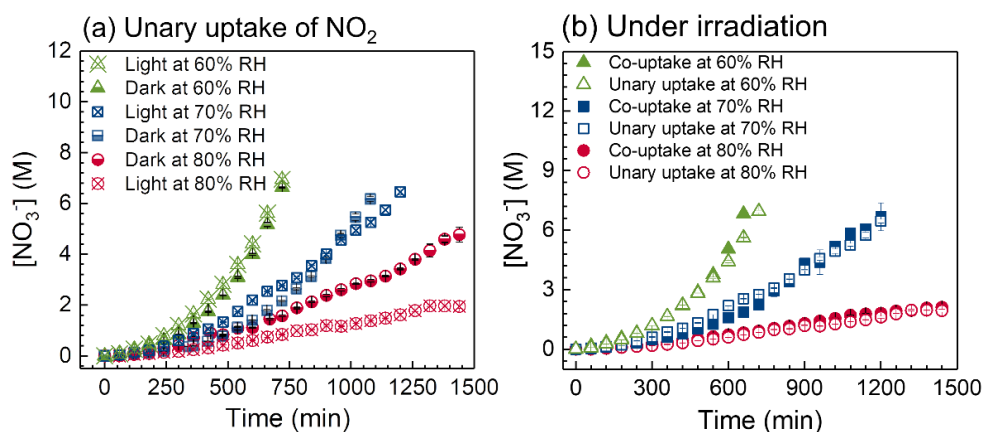

**Figure S20.** (a) Nitrate concentration as a function of time during unary uptake of  $\text{NO}_2$  into  $\text{NaCl}$  droplets at all RHs. (b) The nitrate concentration as a function of time at different RHs during co-/unary uptake under irradiation.

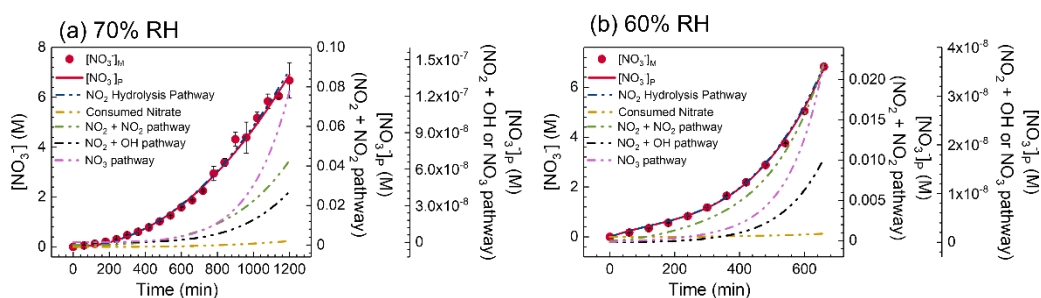

**Figure S21.** Model simulation of nitrate during co-uptake of  $\text{NO}_2$  and  $\text{SO}_2$  at 70% and 60% RH.



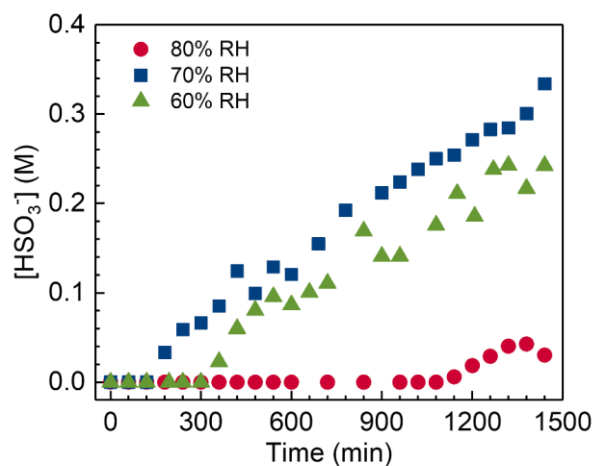

**Figure S22.**  $\text{HSO}_3^-$  concentration as a function of time at 60%, 70%, and 80% RH during unary uptake of  $\text{SO}_2$  under dark. No sulfate was observed in these three conditions.

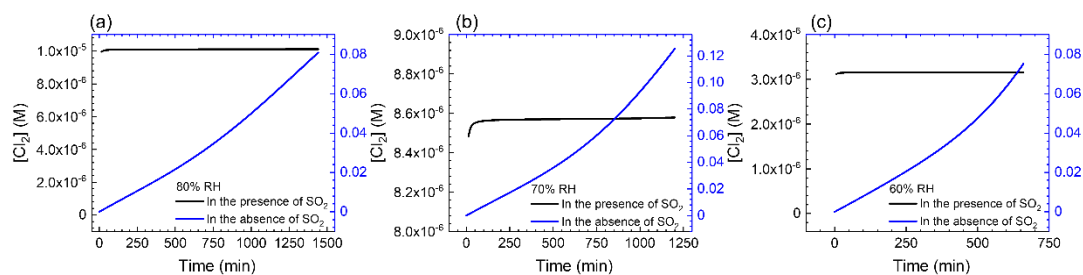

**Figure S23.** Estimated  $\text{Cl}_2$  concentration in the presence and absence of  $\text{SO}_2$  at all RHs.

## Reference:

- (1) Behnke, W.; George, C.; Scheer, V.; Zetzsch, C.: Production and decay of ClNO<sub>2</sub> from the reaction of gaseous N<sub>2</sub>O<sub>5</sub> with NaCl solution: Bulk and aerosol experiments. *J. Geophys. Res. Atmos.*, 102, 3795-3804, 1997.
- (2) Benner, C. L.; Eatough, N. L.; Lewis, E. A.; Eatough, D. J.; Huang, A. A.; Ellis, E. C.: Diffusion coefficients for ambient nitric and nitrous acids from Denuder experiments in the 1985 nitrogen species methods comparison study. *Atmos. Environ.*, 22, 1669-1672, doi.org/[https://doi.org/10.1016/0004-6981\(88\)90395-2](https://doi.org/10.1016/0004-6981(88)90395-2), 1988.
- (3) Bulman, D. M.; Mezyk, S. P.; Remucal, C. K.: The impact of pH and irradiation wavelength on the production of reactive oxidants during chlorine photolysis. *Environ. Sci. Technol.*, 53, 4450-4459, 2019.
- (4) Buxton, G. V.; Greenstock, C. L.; Helman, W. P.; Ross, A. B.: Critical Review of rate constants for reactions of hydrated electrons, hydrogen atoms and hydroxyl radicals ( $\cdot\text{OH}$ ,  $\text{O}^-$  in Aqueous Solution. *J. Phys. Chem. Ref. Data*, 17, 513-886, 1988.
- (5) Galib, M.; Limmer, D. T.: Reactive uptake of N<sub>2</sub>O<sub>5</sub> by atmospheric aerosol is dominated by interfacial processes. *Science*, 371, 921-925, 2021.
- (6) Gen, M.; Zhang, R.; Huang, D. D.; Li, Y.; Chan, C. K.: Heterogeneous Oxidation of SO<sub>2</sub> in Sulfate Production during Nitrate Photolysis at 300 nm: Effect of pH, Relative Humidity, Irradiation Intensity, and the Presence of Organic Compounds. *Environ. Sci. Technol.*, 53, 8757-8766, doi.org/10.1021/acs.est.9b01623, 2019.
- (7) Griffiths, P. T.; Badger, C. L.; Cox, R. A.; Folkers, M.; Henk, H. H.; Mentel, T. F.: Reactive uptake of N<sub>2</sub>O<sub>5</sub> by aerosols containing dicarboxylic acids. Effect of particle phase, composition, and nitrate content. *J. Phys. Chem. A*, 113, 5082-5090, 2009.
- (8) Gutzwiller, L.; George, C.; Rössler, E.; Ammann, M.: Reaction Kinetics of NO<sub>2</sub> with Resorcinol and 2,7-Naphthalenediol in the Aqueous Phase at Different pH. *J. Phys. Chem. A*, 106, 12045-12050, doi.org/10.1021/jp026240d, 2002.
- (9) Horváth, A. K.; Nagypál, I.; Epstein, I. R.: Three Autocatalysts and Self-Inhibition in a Single Reaction: A Detailed Mechanism of the Chlorite–Tetrathionate Reaction. *Inorg. Chem.*, 45, 9877-9883, 2006.
- (10) Huie, R. E.; Neta, P.: Rate constants for some oxidations of S (IV) by radicals in aqueous solutions. *Atmos. Environ.*, 21, 1743-1747, 1987.
- (11) Katsumura, Y.; Jiang, P.; Nagaishi, R.; Oishi, T.; Ishigure, K.; Yoshida, Y.: Pulse radiolysis study of aqueous nitric acid solutions: formation mechanism, yield, and reactivity of NO<sub>3</sub> radical. *J. Phys. Chem.*, 95, 4435-4439, 1991.
- (12) Klaning, U. K.; Sehested, K.; Appelman, E. H.: Laser flash photolysis and pulse radiolysis of aqueous solutions of the fluoroxysulfate ion, SO<sub>4</sub>F. *Inorg. Chem.*, 30, 3582-3584, 1991.
- (13) Klänig, U. K.; Sehested, K.; Wolff, T.: Ozone formation in laser flash photolysis of oxoacids and oxoanions of chlorine and bromine. *Journal of the Chemical Society, Faraday Transactions 1: Physical Chemistry in Condensed Phases*, 80, 2969-2979, 1984.
- (14) Kolb, C.; Davidovits, P.; Jayne, J.; Shi, Q.; Worsnop, D.: Kinetics of trace gas uptake by liquid surfaces. *Prog. React. Kinet. Mech.*, 27, 1-46, 2002.
- (15) Li, P.; Pang, H.; Wang, Y.; Deng, H.; Liu, J.; Loisel, G.; Jin, B.; Li, X.; Vione, D.; Gligorovski, S.: Inorganic Ions Enhance the Number of Product Compounds through Heterogeneous Processing of Gaseous NO<sub>2</sub> on an Aqueous Layer of Acetosyringone. *Environ. Sci. Technol.*, 56, 5398-5408, doi.org/10.1021/acs.est.1c08283, 2022.
- (16) Løgager, T.; Sehested, K.; Holcman, J.: Rate constants of the equilibrium reactions  $\text{SO}_3^- + \text{HNO}_3 \rightleftharpoons \text{HSO}_3^- + \text{NO}_3^-$  and  $\text{SO}_3^- + \text{NO}_3^- \rightleftharpoons \text{SO}_2 + \text{NO}_3^-$ . *Radiat. Phys. Chem.*, 41, 539-543, 1993.
- (17) Machulek, A.; Moraes, J. E. F.; Okano, L. T.; Silvérioc, C. A.; Quina, F. H.: Photolysis of ferric ions in the presence of sulfate or chloride ions: implications for the photo-Fenton process. *Photochemical & Photobiological Sciences*, 8, 985-991, 2009.
- (18) Mekic, M.; Loisel, G.; Zhou, W.; Jiang, B.; Vione, D.; Gligorovski, S.: Ionic-strength effects on the reactive uptake of ozone on aqueous pyruvic acid: Implications for air–sea ozone deposition. *Environ. Sci. Technol.*, 52, 12306-12315, 2018.
- (19) Poskrebyshev, G.; Huie, R.; Neta, P.: The rate and equilibrium constants for the reaction  $\text{NO}_3 + \text{Cl}^- \rightleftharpoons \text{NO}_3^- + \text{Cl}^\bullet$  in aqueous solutions. *J. Phys. Chem. A*, 107, 1964-1970, 2003.

- (20) Scharko, N. K.; Berke, A. E.; Raff, J. D.: Release of nitrous acid and nitrogen dioxide from nitrate photolysis in acidic aqueous solutions. *Environ. Sci. Technol.*, 48, 11991-12001, 2014.
- (21) Sehested, K.; Holcman, J.; Bjergbakke, E.; Hart, E. J.: A pulse radiolytic study of the reaction hydroxyl+ ozone in aqueous medium. *J. Phys. Chem.*, 88, 4144-4147, 1984.
- (22) Seinfeld, J. H.; Pandis, S. N. J. I., New York: Atmospheric chemistry and physics: From air pollution to climate change, John Willey & Sons. 2006.
- (23) Stewart, D. J.; Griffiths, P.; Cox, R.: Reactive uptake coefficients for heterogeneous reaction of  $\text{N}_2\text{O}_5$  with submicron aerosols of NaCl and natural sea salt. *Atmos. Chem. Phys.*, 4, 1381-1388, 2004.
- (24) Yu, X.-Y.; Barker, J. R.: Hydrogen peroxide photolysis in acidic aqueous solutions containing chloride ions. I. Chemical mechanism. *J. Phys. Chem. A*, 107, 1313-1324, 2003.
- (25) Zhang, R.; Gen, M.; Fu, T.-M.; Chan, C. K.: Production of Formate via Oxidation of Glyoxal Promoted by Particulate Nitrate Photolysis. *Environ. Sci. Technol.*, 55, 5711-5720, doi.org/10.1021/acs.est.0c08199, 2021.
- (26) Zhang, R.; Gen, M.; Huang, D.; Li, Y.; Chan, C. K.: Enhanced Sulfate Production by Nitrate Photolysis in the Presence of Halide Ions in Atmospheric Particles. *Environ. Sci. Technol.*, 54, 3831-3839, doi.org/10.1021/acs.est.9b06445, 2020.
